# Supplementary material
Source: PubMed Central journal article supplement (PMC5983376)
Supplement: NIHMS964526-supplement-supplement_1.pdf [file NIHMS964526-supplement-supplement_1.pdf]

**SUPPLEMENTAL FIGURE 1**

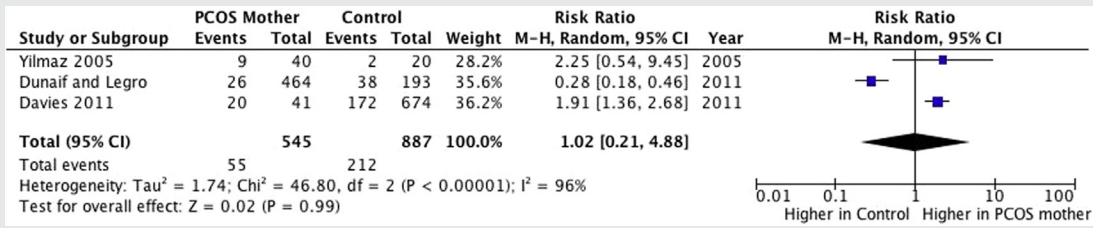

Forest plot of hypertension prevalence in mothers of patients with polycystic ovary syndrome (PCOS) and controls. CI = confidence interval; M-H = Mantel-Haenszel.

Yilmaz. *Metabolic disturbances in PCOS relatives. Fertil Steril* 2017.

**SUPPLEMENTAL FIGURE 2**

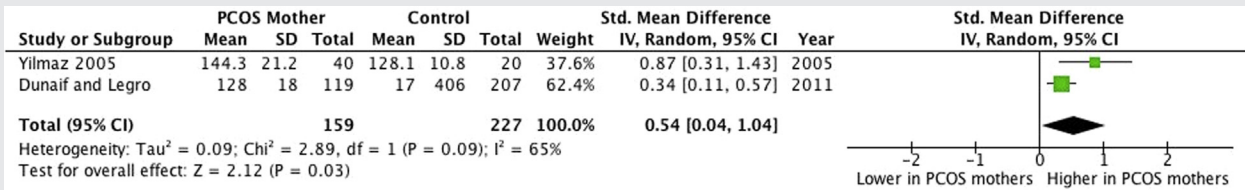

Forest plot of systolic blood pressure in mothers of patients with polycystic ovary syndrome (PCOS) and controls. CI = confidence interval; M-H = Mantel-Haenszel.

Yilmaz. *Metabolic disturbances in PCOS relatives. Fertil Steril* 2017.

**SUPPLEMENTAL FIGURE 3**

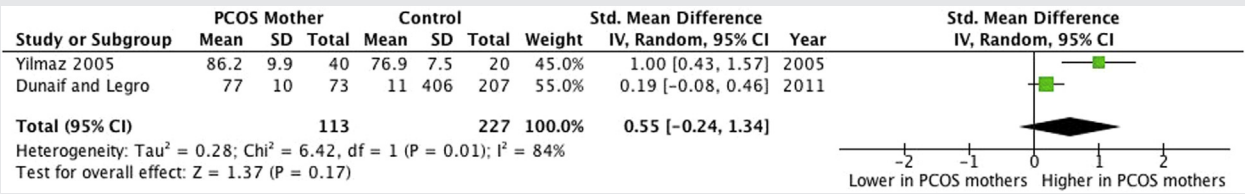

Forest plot of diastolic blood pressure in mothers of patients with polycystic ovary syndrome (PCOS) and controls. CI = confidence interval; M-H = Mantel-Haenszel.

Yilmaz. *Metabolic disturbances in PCOS relatives. Fertil Steril* 2017.

**SUPPLEMENTAL FIGURE 4**

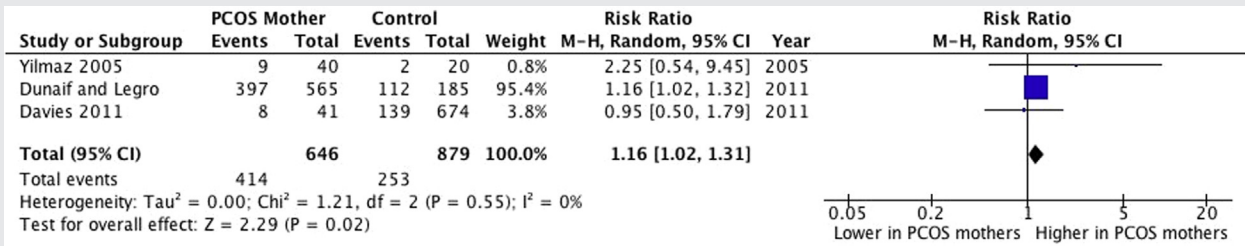

Forest plot of dyslipidemia prevalence in mothers of patients with polycystic ovary syndrome (PCOS) and controls. CI = confidence interval; M-H = Mantel-Haenszel.

Yilmaz. *Metabolic disturbances in PCOS relatives. Fertil Steril* 2017.

**SUPPLEMENTAL FIGURE 5**

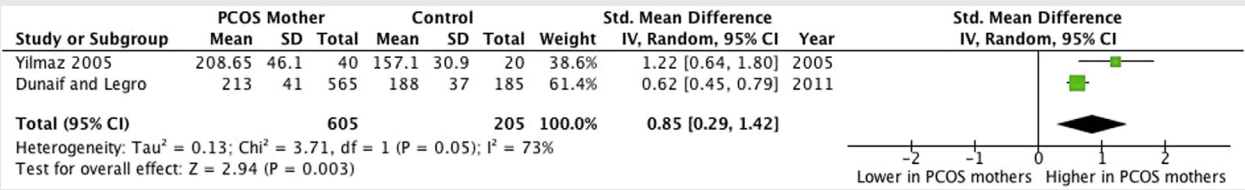

Forest plot of total cholesterol in mothers of patients with polycystic ovary syndrome (PCOS) and controls. CI = confidence interval; M-H = Mantel-Haenszel.

Yilmaz. *Metabolic disturbances in PCOS relatives. Fertil Steril* 2017.

**SUPPLEMENTAL FIGURE 6**

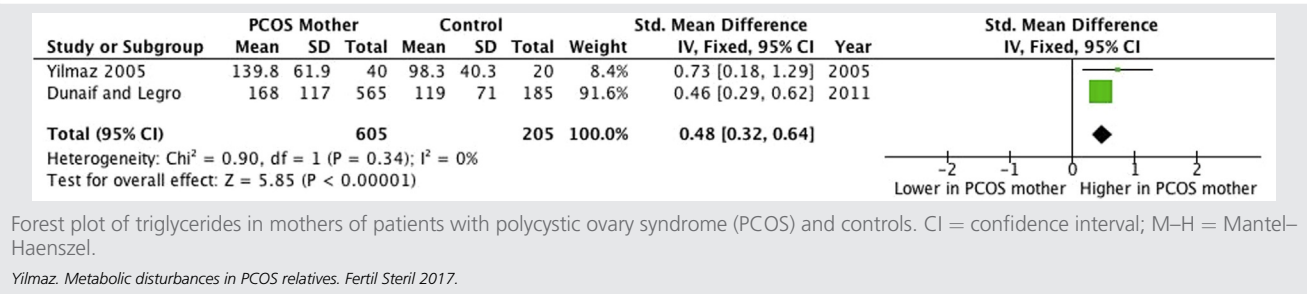

**SUPPLEMENTAL FIGURE 7**

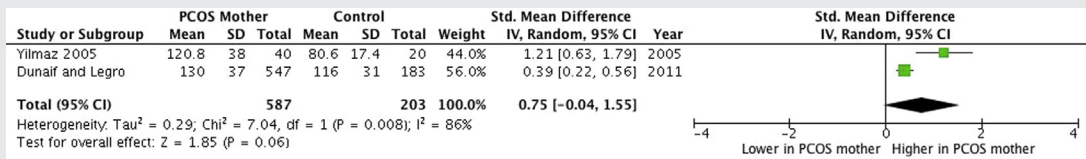

Forest plot of low-density lipoprotein cholesterol in mothers of patients with polycystic ovary syndrome (PCOS) and controls. CI = confidence interval; M-H = Mantel-Haenszel.

Yilmaz. *Metabolic disturbances in PCOS relatives. Fertil Steril* 2017.

**SUPPLEMENTAL FIGURE 8**

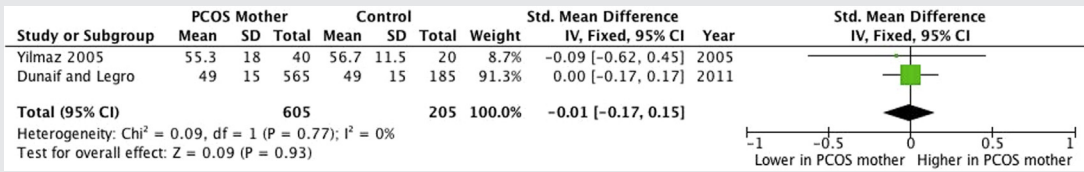

Forest plot of high-density lipoprotein cholesterol in mothers of patients with polycystic ovary syndrome (PCOS) and controls. CI = confidence interval; M-H = Mantel-Haenszel.

Yilmaz. *Metabolic disturbances in PCOS relatives. Fertil Steril* 2017.



**SUPPLEMENTAL FIGURE 9**

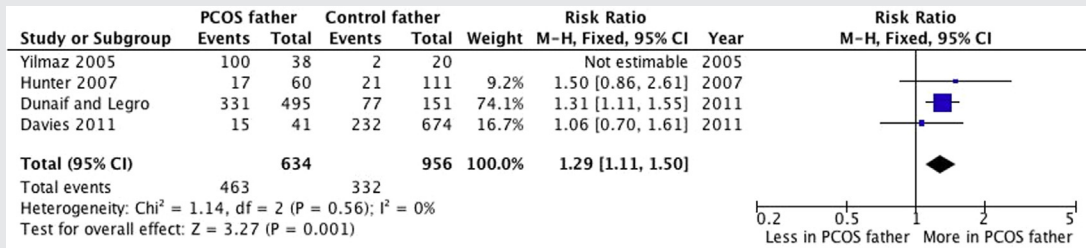

Forest plot of dyslipidemia prevalence in fathers of patients with polycystic ovary syndrome (PCOS) and controls. CI = confidence interval; M-H = Mantel-Haenszel.

Yilmaz. *Metabolic disturbances in PCOS relatives. Fertil Steril* 2017.

**SUPPLEMENTAL FIGURE 10**

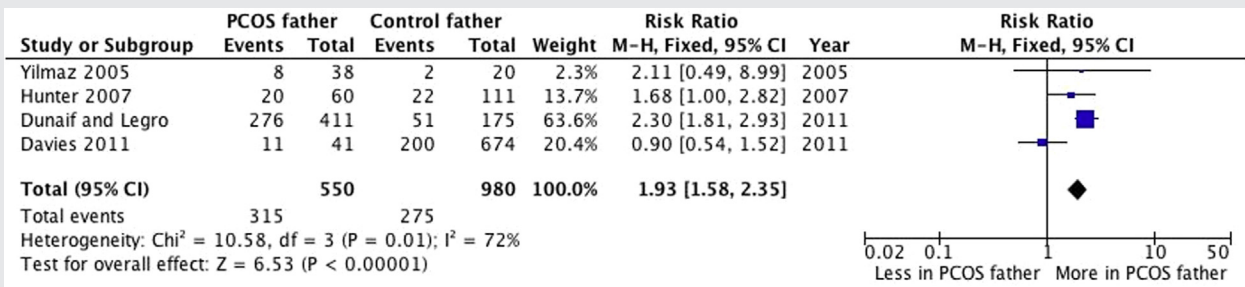

Forest plot of hypertension prevalence in fathers of patients with polycystic ovary syndrome (PCOS) and controls. CI = confidence interval; M-H = Mantel-Haenszel.

Yilmaz. *Metabolic disturbances in PCOS relatives. Fertil Steril* 2017.

**SUPPLEMENTAL FIGURE 11**

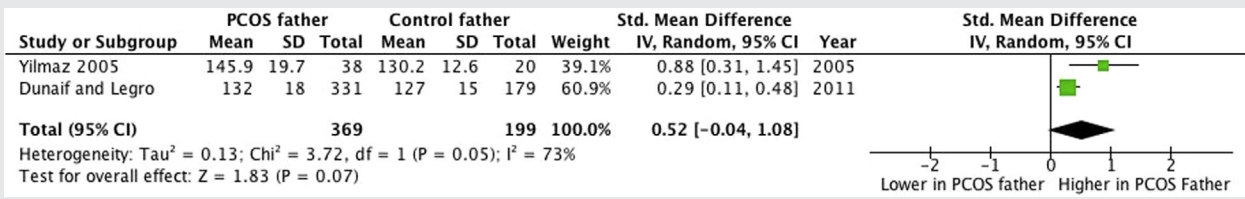

Forest plot of systolic blood pressure in fathers of patients with polycystic ovary syndrome (PCOS) and controls. CI = confidence interval; M-H = Mantel-Haenszel.

Yilmaz. *Metabolic disturbances in PCOS relatives. Fertil Steril* 2017.

**SUPPLEMENTAL FIGURE 12**

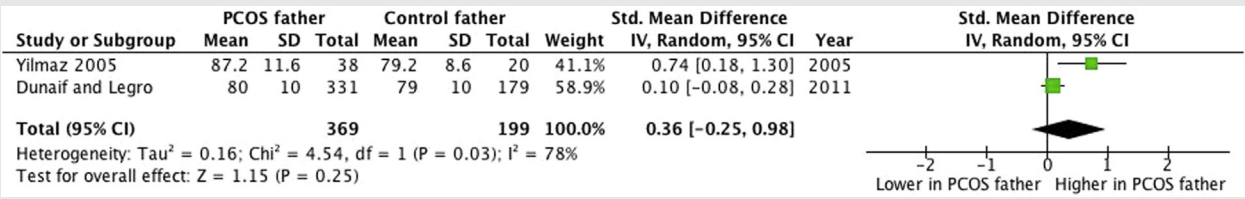

Forest plot of diastolic blood pressure in fathers of patients with polycystic ovary syndrome (PCOS) and controls. CI = confidence interval; M-H = Mantel-Haenszel.

Yilmaz. *Metabolic disturbances in PCOS relatives. Fertil Steril* 2017.

**SUPPLEMENTAL FIGURE 13**

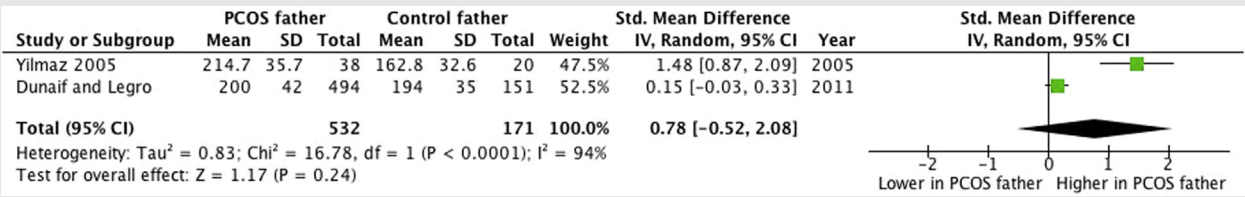

Forest plot of total cholesterol in fathers of patients with polycystic ovary syndrome (PCOS) and controls. CI = confidence interval; M-H = Mantel-Haenszel.

Yilmaz. *Metabolic disturbances in PCOS relatives. Fertil Steril* 2017.

**SUPPLEMENTAL FIGURE 14**

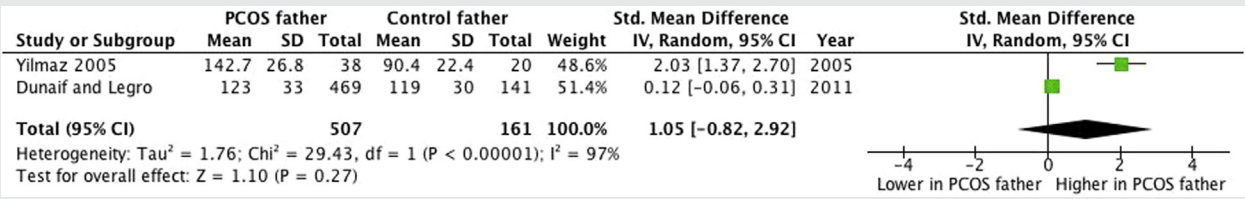

Forest plot of low-density lipoprotein cholesterol in fathers of patients with polycystic ovary syndrome (PCOS) and controls. CI = confidence interval; M-H = Mantel-Haenszel.

Yilmaz. *Metabolic disturbances in PCOS relatives. Fertil Steril* 2017.

**SUPPLEMENTAL FIGURE 15**

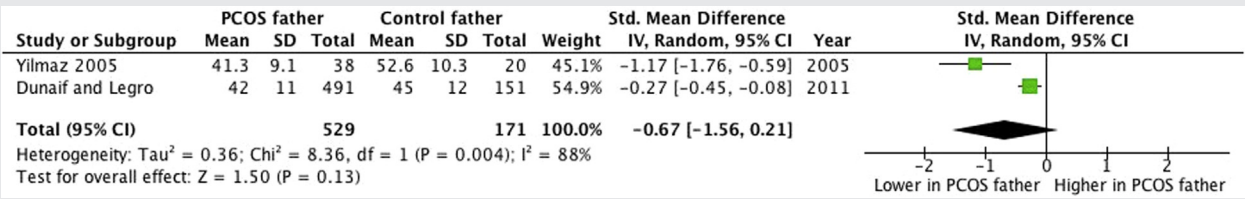

Forest plot of high-density lipoprotein cholesterol in fathers of patients with polycystic ovary syndrome (PCOS) and controls. CI = confidence interval; M-H = Mantel-Haenszel.

Yilmaz. *Metabolic disturbances in PCOS relatives. Fertil Steril* 2017.

**SUPPLEMENTAL FIGURE 16**

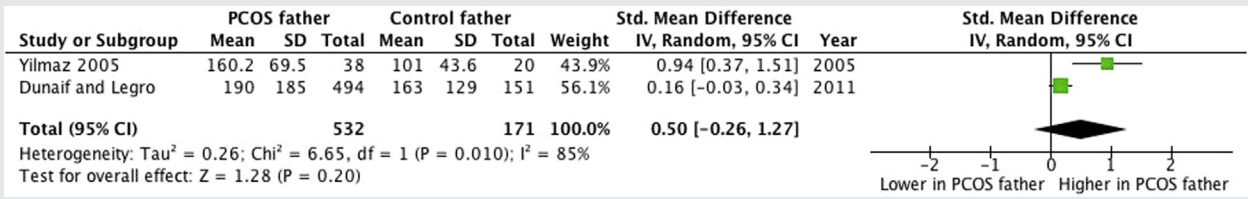

Forest plot of triglycerides in fathers of patients with polycystic ovary syndrome (PCOS) and controls. CI = confidence interval; M-H = Mantel-Haenszel.

Yilmaz. *Metabolic disturbances in PCOS relatives. Fertil Steril* 2017.



**SUPPLEMENTAL FIGURE 17**

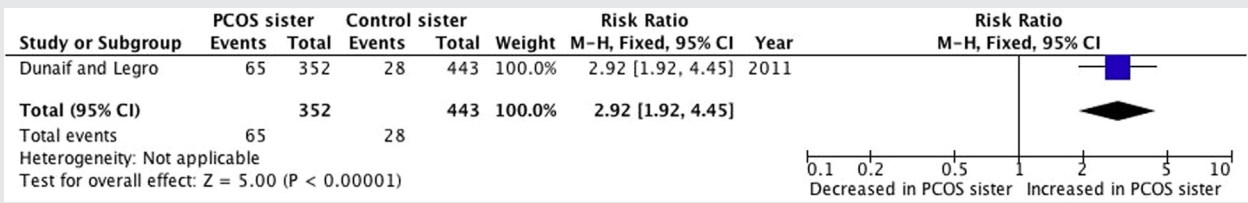

Forest plot of hypertension prevalence in sisters of patients with polycystic ovary syndrome (PCOS) and controls. CI = confidence interval; M-H = Mantel-Haenszel.

Yilmaz. *Metabolic disturbances in PCOS relatives. Fertil Steril* 2017.

**SUPPLEMENTAL FIGURE 18**

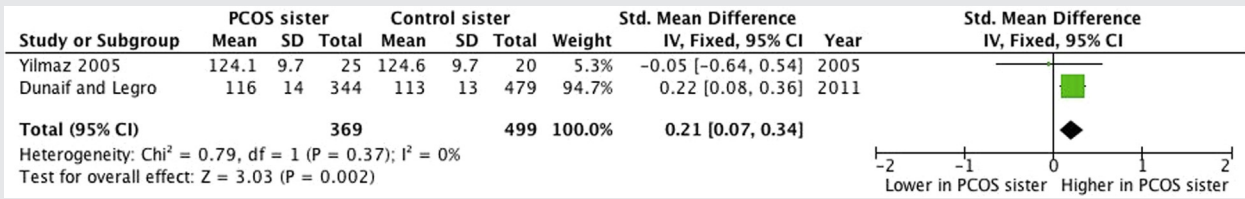

Forest plot of systolic blood pressure in sisters of patients with polycystic ovary syndrome (PCOS) and controls. CI = confidence interval; M-H = Mantel-Haenszel.

Yilmaz. *Metabolic disturbances in PCOS relatives. Fertil Steril* 2017.

**SUPPLEMENTAL FIGURE 19**

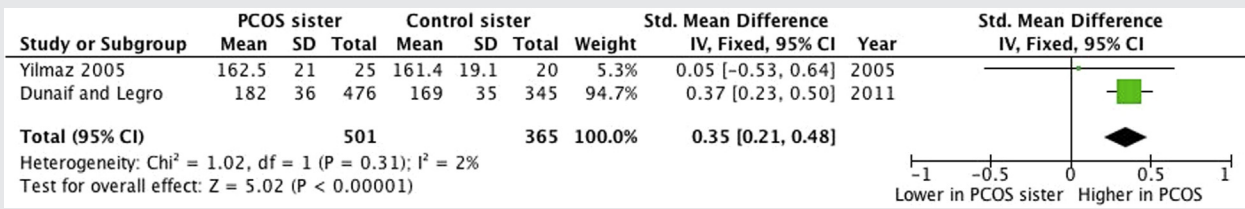

Forest plot of total cholesterol in sisters of patients with polycystic ovary syndrome (PCOS) and controls. CI = confidence interval; M-H = Mantel-Haenszel.

Yilmaz. *Metabolic disturbances in PCOS relatives. Fertil Steril* 2017.

**SUPPLEMENTAL FIGURE 20**

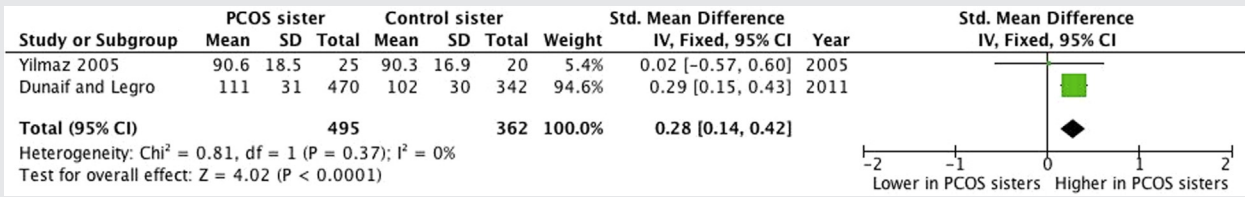

Forest plot of low-density lipoprotein cholesterol in sisters of patients with polycystic ovary syndrome (PCOS) and controls. CI = confidence interval; M-H = Mantel-Haenszel.

Yilmaz. *Metabolic disturbances in PCOS relatives. Fertil Steril* 2017.

**SUPPLEMENTAL FIGURE 21**

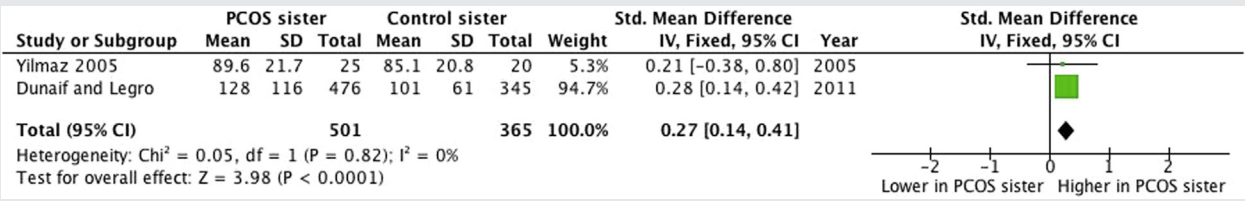

Forest plot of triglycerides in sisters of patients with polycystic ovary syndrome (PCOS) and controls. CI = confidence interval; M-H = Mantel-Haenszel.

Yilmaz. *Metabolic disturbances in PCOS relatives. Fertil Steril* 2017.

**SUPPLEMENTAL FIGURE 22**

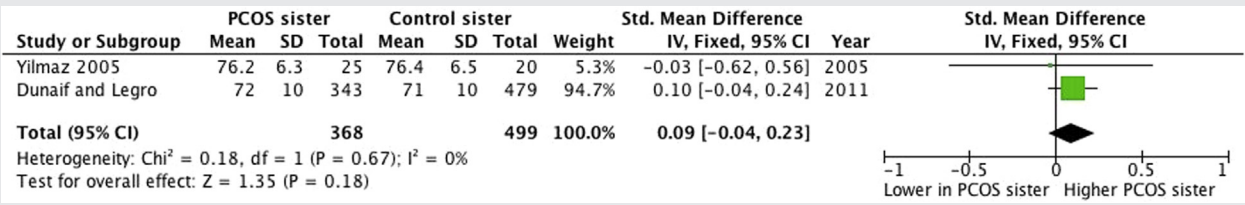

Forest plot of diastolic blood pressure in sisters of patients with polycystic ovary syndrome (PCOS) and controls. CI = confidence interval; M-H = Mantel-Haenszel.

Yilmaz. *Metabolic disturbances in PCOS relatives. Fertil Steril* 2017.

**SUPPLEMENTAL FIGURE 23**

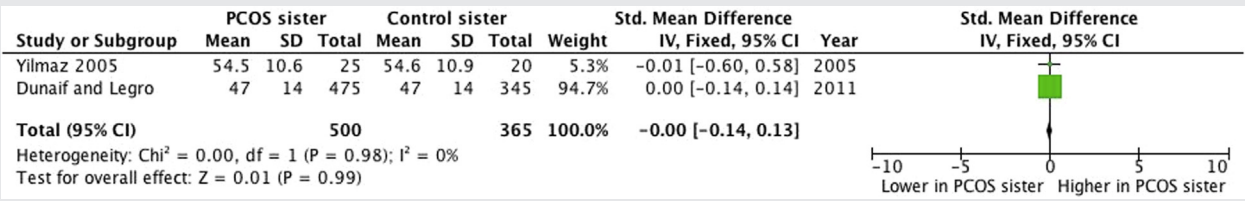

Forest plot of high-density lipoprotein cholesterol in sisters of patients with polycystic ovary syndrome (PCOS) and controls. CI = confidence interval; M-H = Mantel-Haenszel.

Yilmaz. *Metabolic disturbances in PCOS relatives. Fertil Steril* 2017.

**SUPPLEMENTAL FIGURE 24**

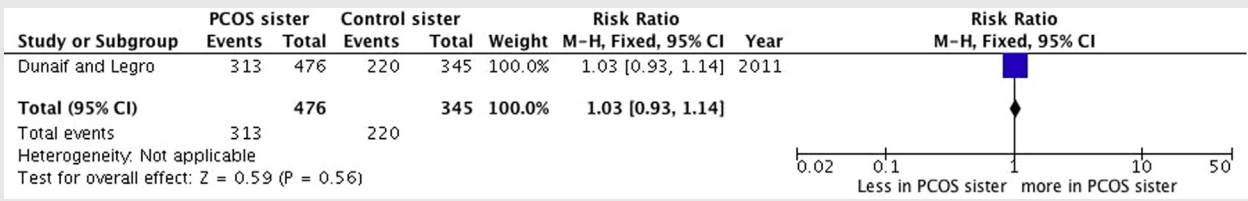

Forest plot of dyslipidemia prevalence in sisters of patients with polycystic ovary syndrome (PCOS) and controls. CI = confidence interval; M-H = Mantel-Haenszel.

Yilmaz. *Metabolic disturbances in PCOS relatives. Fertil Steril* 2017.



**SUPPLEMENTAL FIGURE 25**

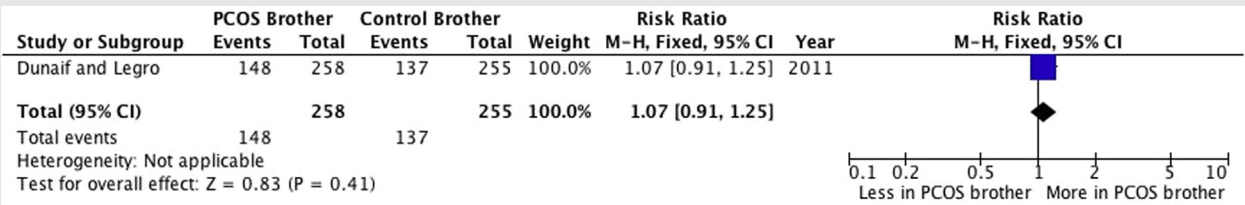

Forest plot of dyslipidemia prevalence in brothers of patients with polycystic ovary syndrome (PCOS) and controls. CI = confidence interval; M-H = Mantel-Haenszel.

Yilmaz. *Metabolic disturbances in PCOS relatives. Fertil Steril* 2017.

**SUPPLEMENTAL FIGURE 26**

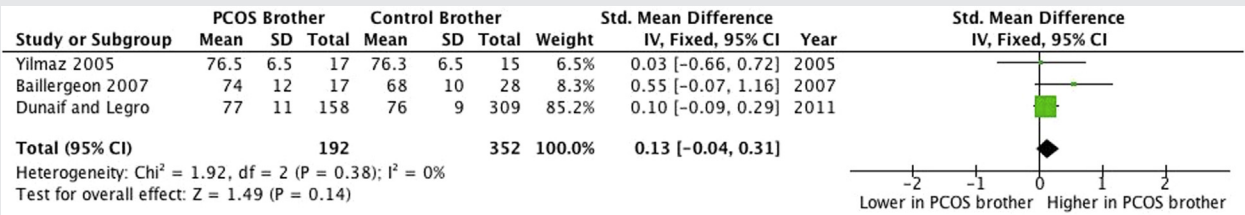

Forest plot of diastolic blood pressure in brothers of patients with polycystic ovary syndrome (PCOS) and controls. CI = confidence interval; M-H = Mantel-Haenszel.

Yilmaz. *Metabolic disturbances in PCOS relatives. Fertil Steril* 2017.

**SUPPLEMENTAL FIGURE 27**

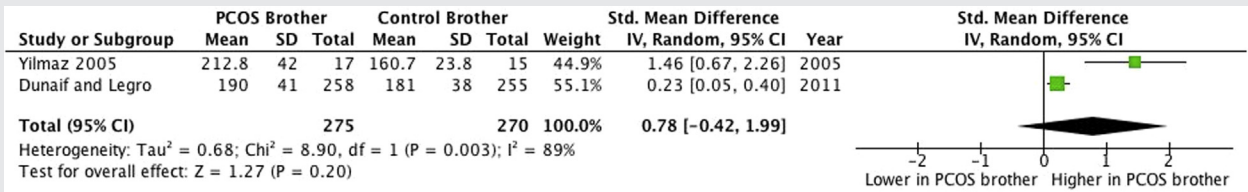

Forest plot of total cholesterol in brothers of patients with polycystic ovary syndrome (PCOS) and controls. CI = confidence interval; M-H = Mantel-Haenszel.

Yilmaz. *Metabolic disturbances in PCOS relatives. Fertil Steril* 2017.

**SUPPLEMENTAL FIGURE 28**

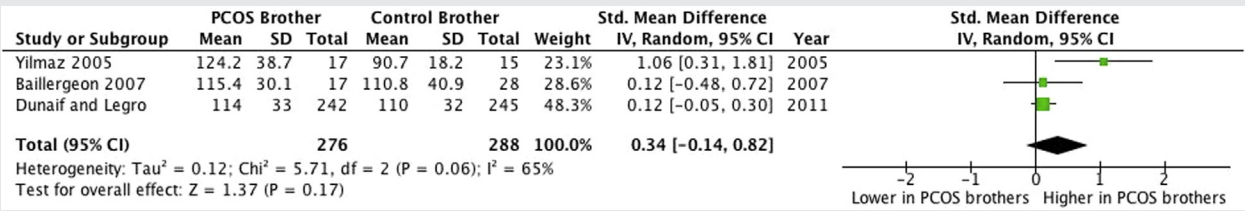

Forest plot of low-density lipoprotein cholesterol in brothers of patients with polycystic ovary syndrome (PCOS) and controls. CI = confidence interval; M-H = Mantel-Haenszel.

Yilmaz. *Metabolic disturbances in PCOS relatives. Fertil Steril* 2017.

**SUPPLEMENTAL FIGURE 29**

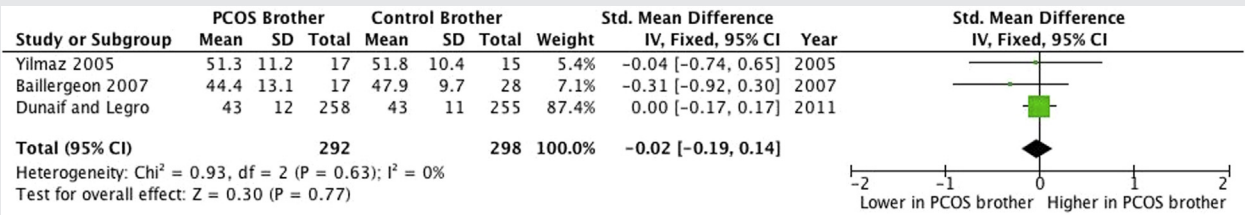

Forest plot of high-density lipoprotein cholesterol in brothers of patients with polycystic ovary syndrome (PCOS) and controls. CI = confidence interval; M-H = Mantel-Haenszel.

Yilmaz. *Metabolic disturbances in PCOS relatives. Fertil Steril* 2017.

**SUPPLEMENTAL FIGURE 30**

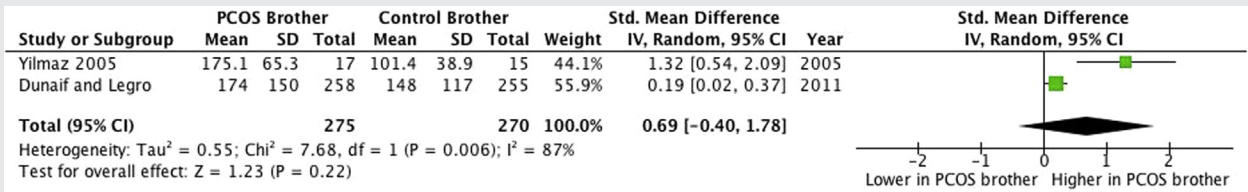

Forest plot of triglyceride in brothers of patients with polycystic ovary syndrome (PCOS) and controls. CI = confidence interval; M-H = Mantel-Haenszel.

Yilmaz. *Metabolic disturbances in PCOS relatives. Fertil Steril* 2017.

**SUPPLEMENTAL FIGURE 31**

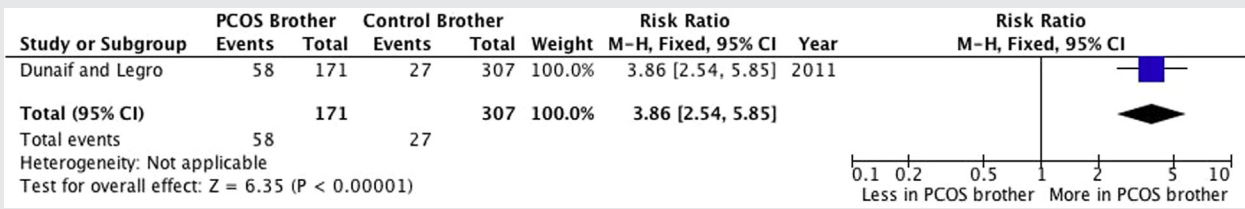

Forest plot of hypertension prevalence in brothers of patients with polycystic ovary syndrome (PCOS) and controls. CI = confidence interval; M-H = Mantel-Haenszel.

Yilmaz. *Metabolic disturbances in PCOS relatives. Fertil Steril* 2017.

**SUPPLEMENTAL FIGURE 32**

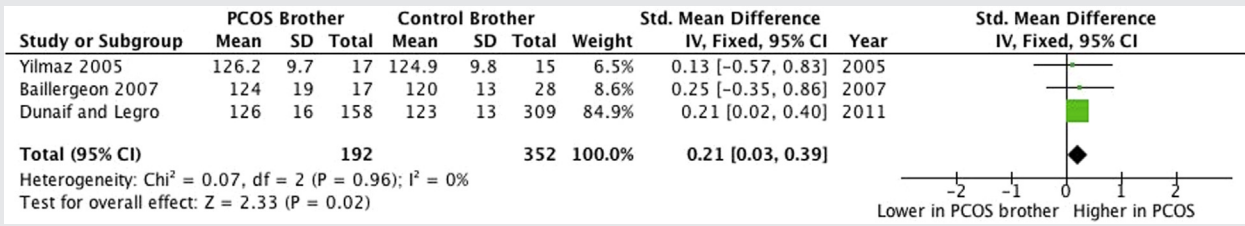

Forest plot of systolic blood pressure in brothers of patients with polycystic ovary syndrome (PCOS) and controls. CI = confidence interval; M-H = Mantel-Haenszel.

Yilmaz. *Metabolic disturbances in PCOS relatives. Fertil Steril* 2017.
